# Supplementary material
Source: Springer Nature journal article supplement (https://www.springermedizin.de/resource/supplementary/12877_2012_782_MOESM1_ESM.pdf/9440324)
Supplement: MOESM1 [file 9440324]

Total number of patients approached for inclusion in study (n=820)

Unable to participate (n=460):

- Declined (n=35)
- Surgery cancelled (n=7)
- Non-responder (n=341)
- Unable to complete survey due to language or comprehension difficulty (n=77)

Patients who agreed to participate (n=360)

- Missing eye classification for group allocation (n=14)

Cataract surgery on first eye only during study period

(n=87)

Cataract surgery on both eyes during study period

(n=55)

Cataract surgery on second eye only during study period

(n=204)

(n=87)

Analysis cohort: 'All first eye' (n=142)

(n=55)

(n=55)

Analysis cohort: 'Both eyes' (n=55)
